# Supplementary material for: Modulation of interfacial electronic structure in Ni3P/NiFe LDH p–n junction for efficient oxygen evolution at ampere-level current density
Source: Royal Society of Chemistry journal article supplement (doi:10.1039/d3gc02105j), 2023-01-01
Supplement: d3gc02105j1.pdf [file d3gc02105j1.pdf]

### Supporting Information

Modulation of interfacial electronic structure in Ni<sub>3</sub>P/NiFe LDH p-n junction for efficient oxygen evolution at ampere-level current density

Xiaochen Zhang,<sup>a</sup> Hui Xue,<sup>\*a</sup> Jing Sun,<sup>a</sup> Niankun Guo,<sup>a</sup> Tianshan Song,<sup>a</sup> Jiawen Sun,<sup>a</sup>

Yi-Ru Hao,<sup>a</sup> and Qin Wang<sup>\*a</sup>

<sup>a</sup> College of Chemistry and Chemical Engineering, Inner Mongolia University, Hohhot, 010021 (P. R. China)

\*Corresponding authors: E-mail: qinwang@imu.edu.cn (Q. Wang)

## **Material characterization**

Morphology and structure Characterization: XRD patterns of the samples were measured on a powder X-ray diffraction system (XRD, PuXi XD3) using Cu K $\alpha$  radiation ( $\lambda = 0.15405$  nm). SEM analysis was carried out on the QUANTA FEG 400 thermal field emission scanning electron microanalyzer of FEI company in the United States. The test conditions: accelerated voltage of 20000 V. Transmission electron microscope (TEM) and high-resolution transmission electron microscope (HRTEM) images were recorded on Japan-JEOL-JEM 2100F transmission electron microscope system. The X-ray photoelectron spectrometer used in this paper is VG Scientific ESCALAB Mark II. The test conditions: excitation source Al K $\alpha$  ray source, power of about 300 W, and basic vacuum of  $3 \times 10^{-9}$  mbar. All the measured elemental data are corrected by the C 1s peak at 284.8 eV. The d-band center was obtained by using the ultraviolet photoelectron spectrometer, the model was ESCALAB Xi+, and the test conditions: ultraviolet light source He I, vacuum degree  $10^{-8}$  mbar. Diffuse reflection absorption curve is obtained by using UV-VIS spectrometer (UH4150), and the test band is 200-2500 nm.

## **Electrochemical measurement**

Electrodeposition preparation of samples and all electrochemical performance tests were carried out on Brilliance Electrochemical Workstation (CHI 760E, CH Instruments, Shanghai). Electrolyte is 1 M KOH, and a simulated seawater test is conducted using a solution of 1 M KOH and 0.5 NaCl.

HER and OER tests involved in this paper were all carried out in a three-electrode

system, with carbon rod as the counter electrode, Hg/HgO as the reference electrode, and the synthesized catalyst as the working electrode (the test area is  $0.5 \times 0.5 \text{ cm}^2$ ). The electrochemical total hydrolysis reaction adopts a double-electrode system, in which the cathode and anode are self-supporting electrodes synthesized in the experiment.

All voltages mentioned in this paper have been calibrated to the voltage of a relatively reversible hydrogen electrode (RHE). The measured voltage (relative to the Hg/HgO electrode) was calibrated to the RHE voltage by the Nernst equation:

$$E_{\text{RHE}} = E_{\text{Hg/HgO}} + 0.059 \times \text{pH} + 0.098$$

In the experiment, all LSV polarization curves were measured at a scanning rate of  $2 \text{ mV} \cdot \text{s}^{-1}$ , and 85% manual iR compensation was carried out in the test. Before LSV test, the samples were tested by cyclic voltammetry (CV) at fast scanning speed to keep the electrode surface basically stable. For OER, the voltage window is set to 0 - 1 V, and for HER reaction, the voltage window is set to -1.5 - -0.8 V. For the OER process, in order to avoid the overlapping of the oxidation peak and the OER signal, negative scanning (inverse scanning) was chosen to obtain the experimental data. When electrochemical impedance spectroscopy (EIS) is tested, the frequency range is set to  $10^{-1}$  to  $10^6 \text{ Hz}$  and the amplitude is  $5 \text{ mV} \cdot \text{s}^{-1}$ , and the same group of samples are tested at the same voltage. In order to obtain the  $C_{\text{dl}}$  of catalytic materials, we measured the CV curves at different scanning rates (10, 20, 30, 40, 50, 60  $\text{mV} \cdot \text{s}^{-1}$ ) in the non-Faraday voltage range, drew the curve between the corresponding scanning rate and the current difference at the midpoint of the potential range and fitted it, and

selected the voltage range of oxygen evolution reaction as 0 - 0.1 V; For the hydrogen evolution reaction, the voltage range is -0.874 - -0.774 V. The electric double layer capacitance is proportional to the electrochemical active surface area, and according to this relationship, the electrochemical active surface area of catalysts can be obtained. The stability of the catalyst was characterized by chronoamperometry (i-t) and chronopotentiometry (v-t).

### **Calculation of TOF**

The current density map of OER can be transformed into turnover frequency (TOF) map using the formula:  $TOF = j \cdot A / (4 \cdot F \cdot n)$ , where:  $j$  is the current density ( $A \cdot cm^{-2}$ ),  $A$  is the active surface area of each electrode, 4 represents the four-electron transfer process,  $F$  is the Faraday constant ( $96485.3 C \cdot mol^{-1}$ ), and  $n$  is the number of active site moles.

### **Calculate the Faraday efficiency**

Faraday efficiency (FE) is calculated by the drainage gas collection method, and the formula is  $FE = n_{gas} \cdot Z \cdot F / (I \cdot t)$ . Where  $Z$  is the number of electrons needed to form A molecule of gas product ( $O_2$  is 4,  $H_2$  is 2),  $F$  is Faraday's constant ( $96485.3 C \cdot mol^{-1}$ ),  $I$  is current (A), and  $t$  is time (s).

## DFT calculations

We have employed the first-principles to perform spin-polarization density functional theory (DFT) calculations within the generalized gradient approximation (GGA) using the Perdew-Burke-Ernzerhof (PBE) formulation.<sup>1-3</sup> We have chosen the projected augmented wave (PAW) potentials to describe the ionic cores and take valence electrons into account using a plane wave basis set with a kinetic energy cutoff of 520 eV.<sup>4,5</sup> Partial occupancies of the Kohn-Sham orbitals were allowed using the Gaussian smearing method and a width of 0.05 eV. The electronic energy was considered self-consistent when the energy change was smaller than  $10^{-5}$  eV. A geometry optimization was considered convergent when the energy change was smaller than 0.05 eV Å<sup>-1</sup>. The vacuum spacing in a direction perpendicular to the plane of the structure is 18 Å. The Brillouin zone integration is performed using  $2 \times 2 \times 1$  Monkhorst-Pack k-point sampling for a structure. Finally, the adsorption energies (Eads) were calculated as  $E_{ads} = E_{ad/sub} - E_{ad} - E_{sub}$ , where  $E_{ad/sub}$ ,  $E_{ad}$ , and  $E_{sub}$  are the total energies of the optimized adsorbate/substrate system, the adsorbate in the structure, and the clean substrate, respectively. The free energy was calculated using the equation:

$$G = E_{ads} + ZPE - TS$$

where G,  $E_{ads}$ , ZPE and TS are the free energy, total energy from DFT calculations, zero point energy and entropic contributions, respectively.

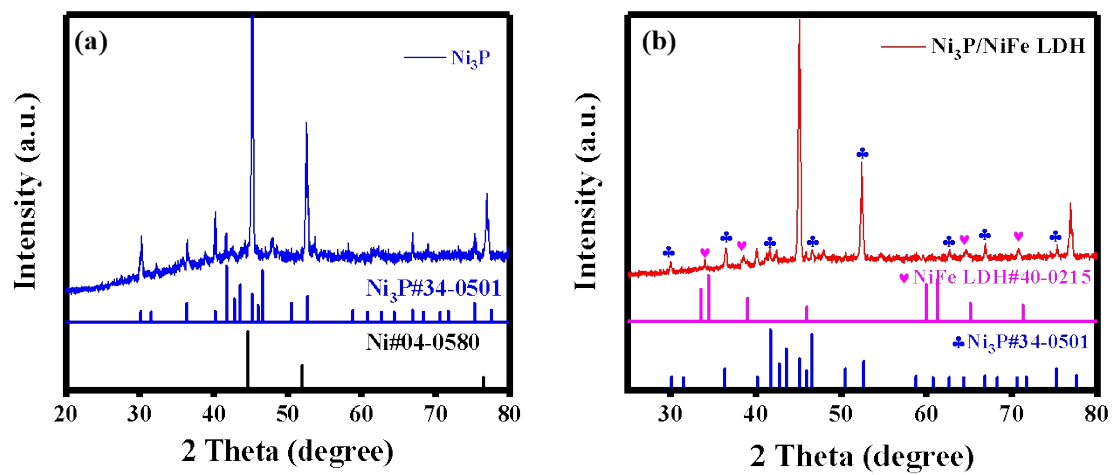

**Fig. S1** XRD patterns of (a)  $\text{Ni}_3\text{P}$ ; (b)  $\text{Ni}_3\text{P}/\text{NiFe LDH}$ .

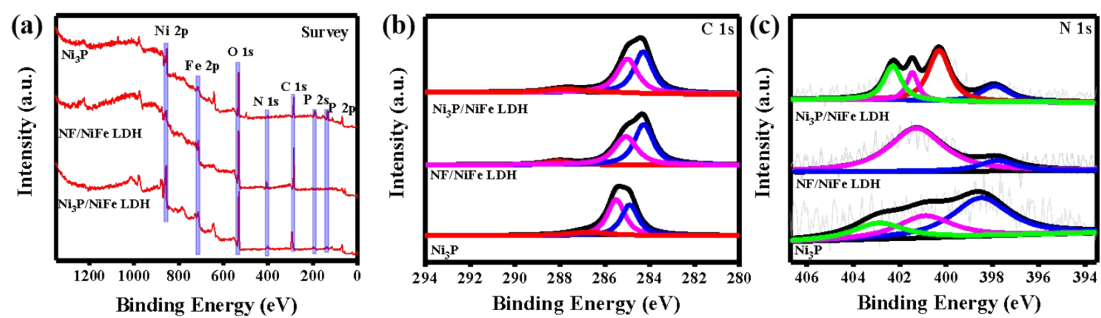

**Fig. S2** XPS spectra of  $\text{Ni}_3\text{P}$ , NF/NiFe LDH, and  $\text{Ni}_3\text{P}/\text{NiFe LDH}$ . (a) XPS survey; (b) C 1s; (c) N 1s.

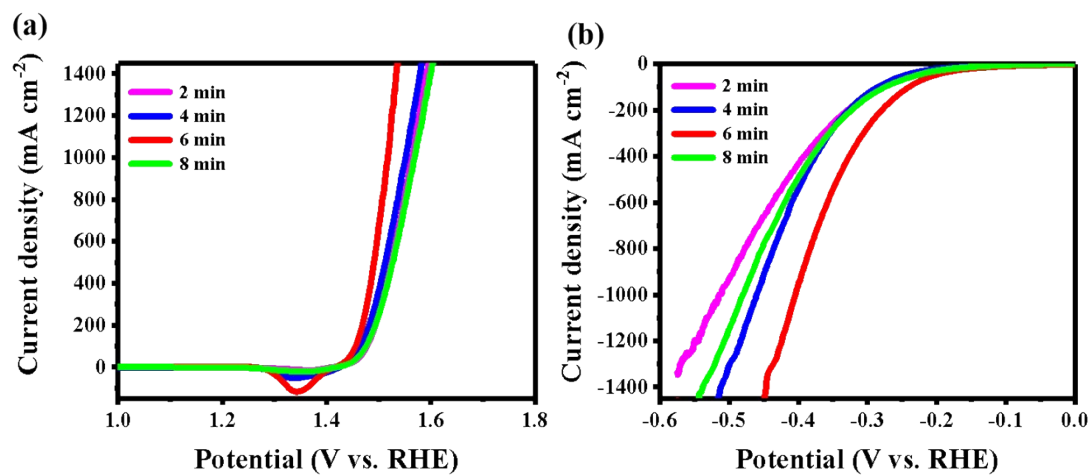

**Fig. S3** Adjusting the electrodeposition time: (a) OER LSV polarization curves; (b) HER LSV polarization curves.



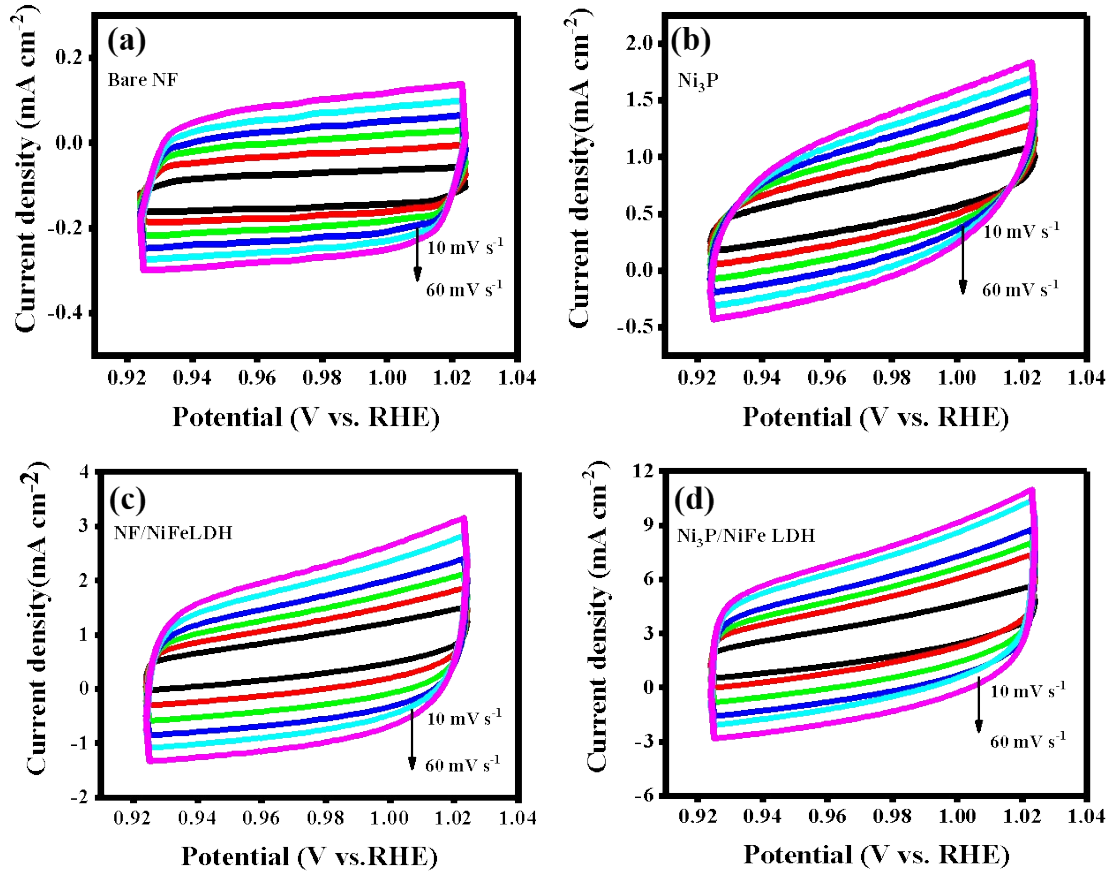

**Fig. S4** OER CV curves of (a) Bare NF, (b)  $\text{Ni}_3\text{P}$ , (c) NF/NiFe LDH, (d)  $\text{Ni}_3\text{P}/\text{NiFe}$  LDH catalysts at different scan rates of 10, 20, 30, 40, 50, and 60  $\text{mV}\cdot\text{s}^{-1}$  in a non-Faradaic region.

The specific capacitance of the flat reference material of 1  $\text{cm}^2$  is usually  $40 \mu\text{F}\cdot\text{cm}^{-2}$ , and the electrochemically active surface area of the catalyst is calculated by analogy.

Calculation of ECSA for each catalyst:

$$\text{ECSA} = C_{\text{dl}}/C_s$$

$$\text{ECSA Bare NF} = 2.8 \text{ mF}\cdot\text{cm}^{-2}/40 \mu\text{F}\cdot\text{cm}^{-2} = 70 \text{ cm}^{-2}_{\text{ECSA}}$$

$$\text{ECSA Ni}_x\text{P}_y = 10.4 \text{ mF}\cdot\text{cm}^{-2}/40 \mu\text{F}\cdot\text{cm}^{-2} = 260 \text{ cm}^{-2}_{\text{ECSA}}$$

$$\text{ECSA NF/NiFe LDH} = 24.8 \text{ mF}\cdot\text{cm}^{-2}/40 \mu\text{F}\cdot\text{cm}^{-2} = 620 \text{ cm}^{-2}_{\text{ECSA}}$$

$$\text{ECSA Ni}_x\text{P}_y/\text{NiFe LDH} = 44.8 \text{ mF}\cdot\text{cm}^{-2}/40 \mu\text{F}\cdot\text{cm}^{-2} = 1120 \text{ cm}^{-2}_{\text{ECSA}}$$

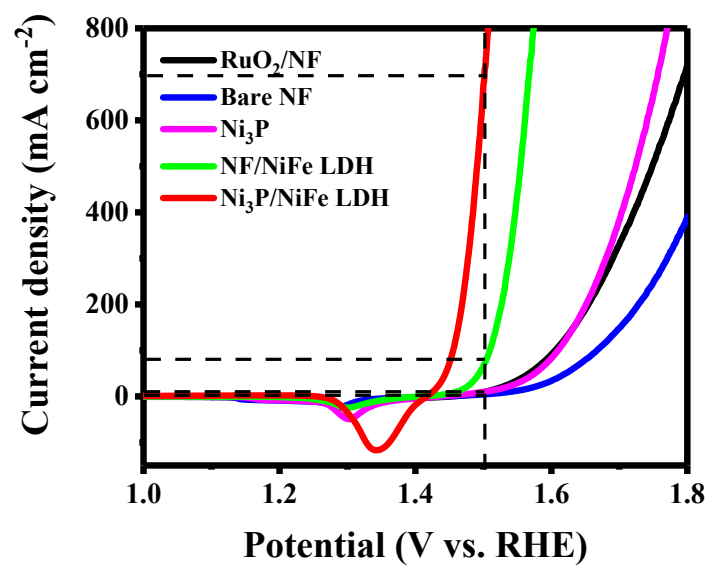

**Fig. S5** OER polarization curves of catalysts in 1 M KOH.

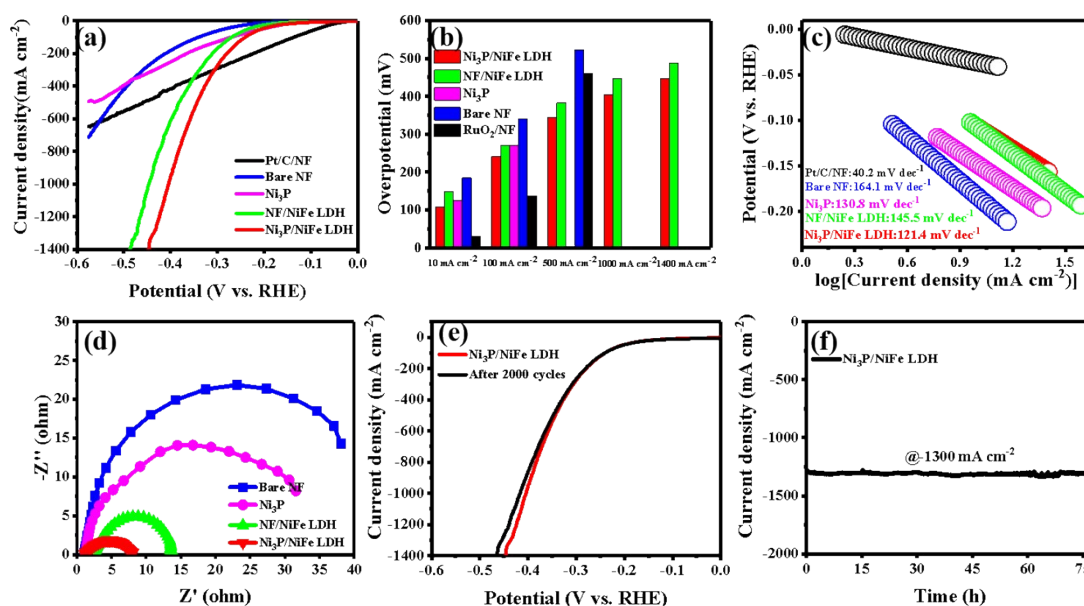

**Fig. S6** (a) HER polarization curves of bare NF,  $\text{Ni}_3\text{P}$ , NF/NiFe LDH, and  $\text{Ni}_3\text{P/NiFe LDH}$  in 1.0 M KOH solution; (b) HER overpotentials at current densities; (c) Tafel slopes; (d) EIS; (e) LSV curves of  $\text{Ni}_3\text{P/NiFe LDH}$  before and after 2000 CV cycles; (f) Timing current (i-t) stability test.

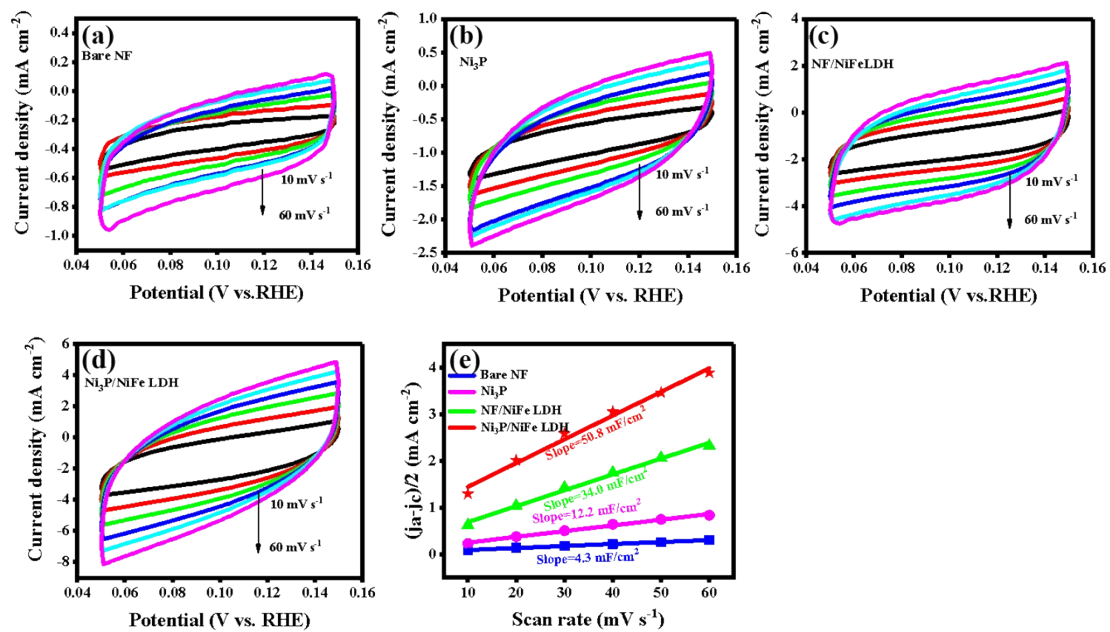

**Fig. S7** (a-d) HER CV curves of bare NF,  $\text{Ni}_3\text{P}$ , NF/NiFe LDH, and  $\text{Ni}_3\text{P}/\text{NiFe LDH}$  at different scanning rates (10, 20, 30, 40, 50, and 60  $\text{mV} \cdot \text{s}^{-1}$ ) in the non-Faraday region; (e)  $C_{\text{dl}}$ .

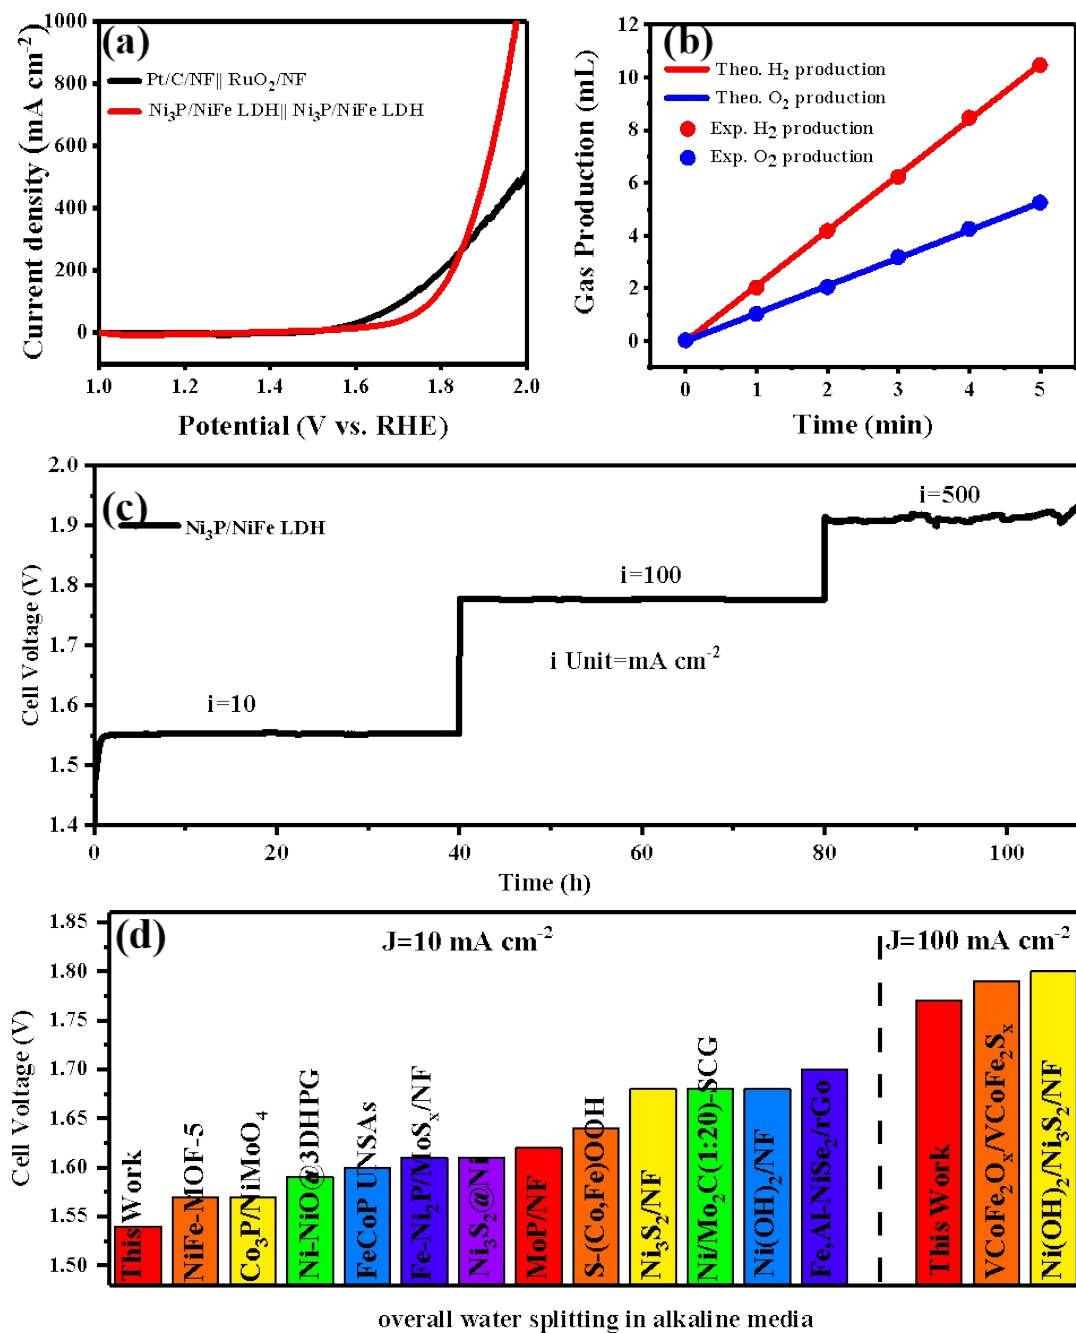

**Fig. S8** (a) LSV polarization curve of  $\text{Ni}_3\text{P/NiFe LDH} \parallel \text{Ni}_3\text{P/NiFe LDH}$  and  $\text{RuO}_2/\text{NF} \parallel \text{Pt/C/NF}$  double electrode system in 1.0 M KOH solution; (b) Faraday efficiency; (c) Continuous constant potential (v-t) stability test; (d) Comparison of overall water splitting properties at 10 and 100  $\text{mA cm}^{-2}$ .

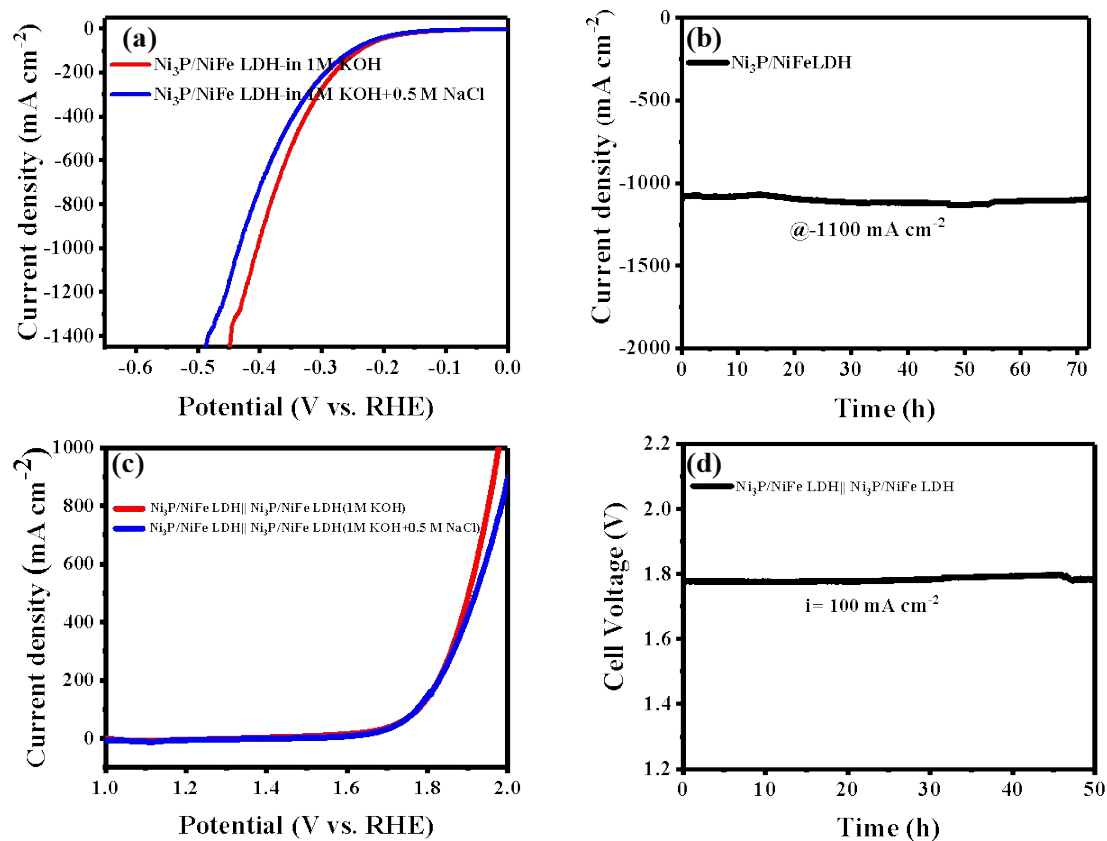

**Fig. S9**  $\text{Ni}_3\text{P}/\text{NiFe}$  LDH in 1 M KOH and simulated seawater electrolyte (1 M KOH + 0.5 M NaCl). (a) HER LSV curves; (b) Timing current (i-t) stability test in a simulated seawater electrolyte; (c) totally dissolved (seawater) water test of  $\text{Ni}_3\text{P}/\text{NiFe}$  LDH ||  $\text{Ni}_3\text{P}/\text{NiFe}$  LDH double electrode system; (d) stability test in a simulated seawater electrolyte.

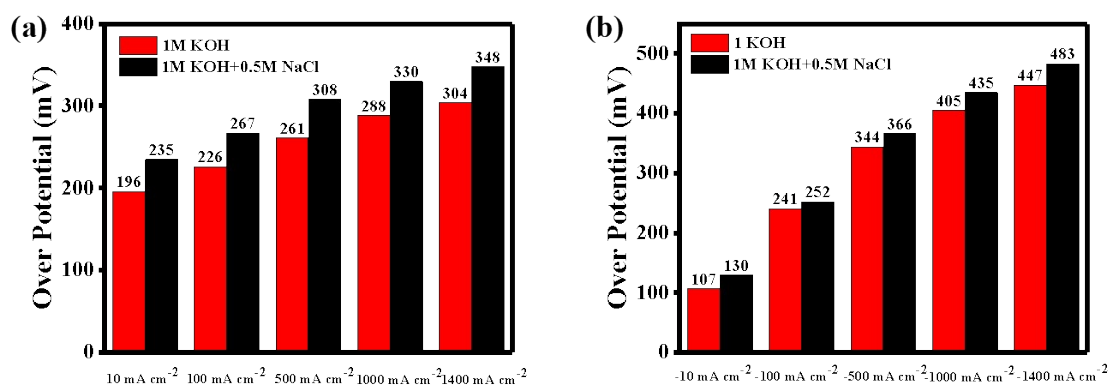

**Fig. S10** (a) OER overpotentials required for  $j = 10, 100, 500, 1000$ , and  $1400 \text{ mA} \cdot \text{cm}^{-2}$ . (b) HER overpotentials required for  $j = -10, -100, -500, -1000$ , and  $-1400 \text{ mA} \cdot \text{cm}^{-2}$ .

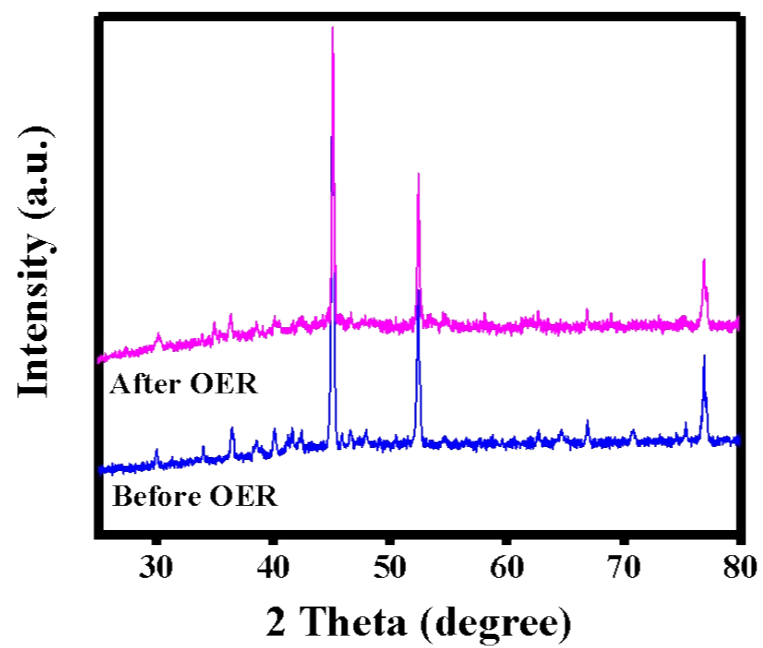

**Fig. S11** XRD pattern of Ni<sub>3</sub>P/NiFe LDH before and after reaction.



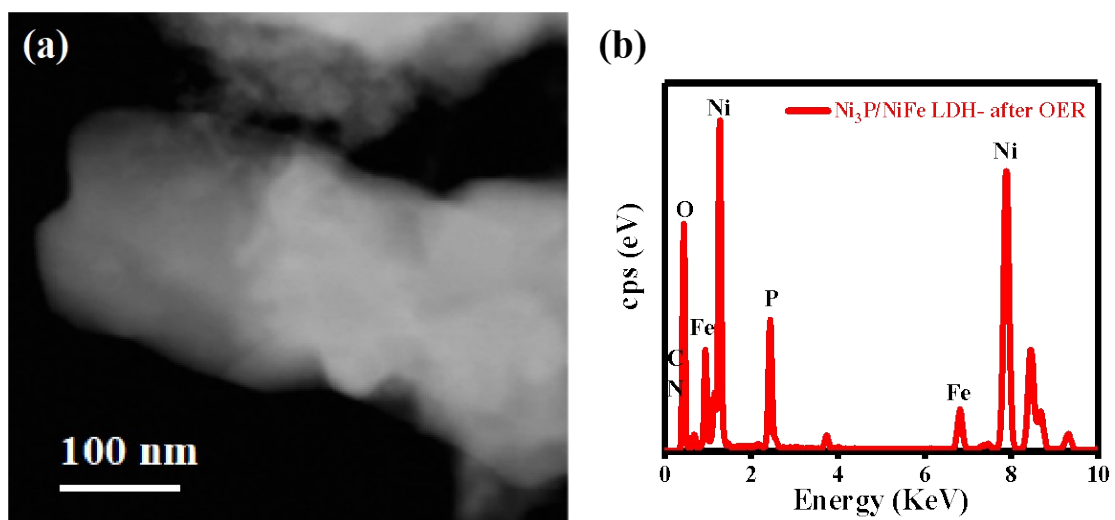

**Fig. S12** (a) HAADF-STEM image; (b) STEM-EDX spectra of Ni<sub>3</sub>P/NiFe LDH after OER.

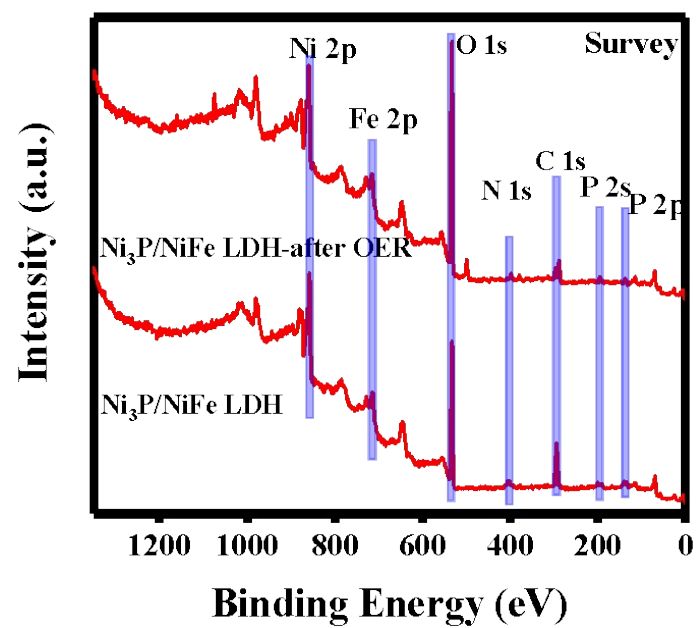

**Fig. S13** XPS survey of  $\text{Ni}_3\text{P/NiFe LDH}$  before and after reaction.

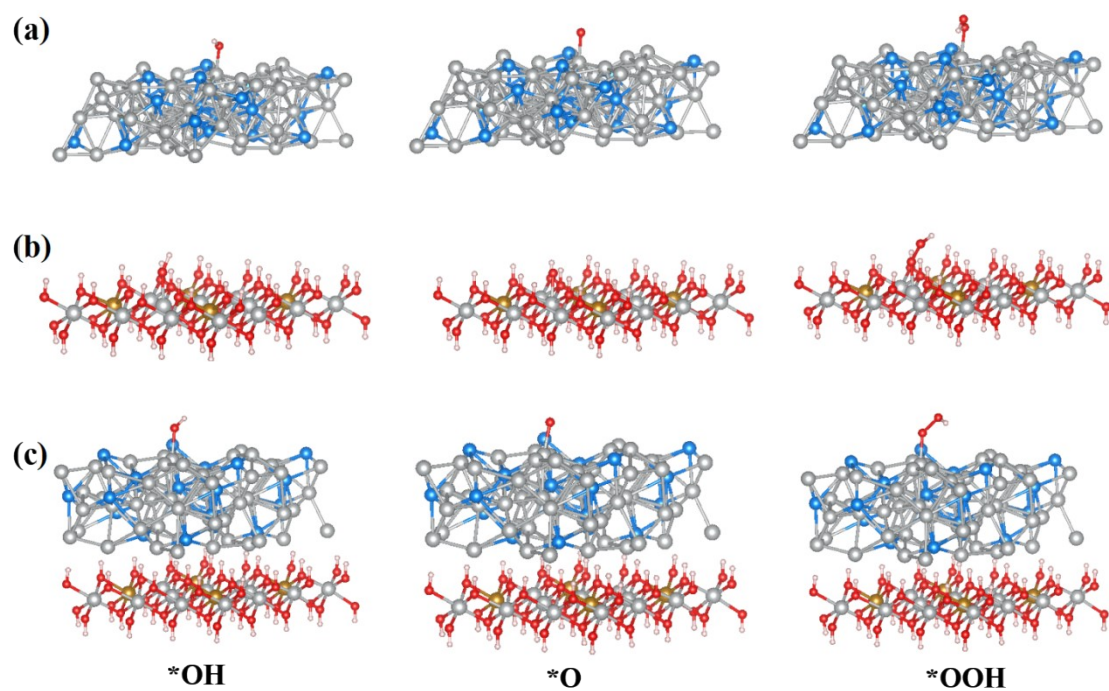

**Fig. 14** Intermediate state (\*OOH, \*O, \*OH) structure of OER process (a) Ni<sub>3</sub>P; (b) NiFe LDH; (c) Ni<sub>3</sub>P/NiFe LDH.

Table S1. XPS elemental quantitative analysis results of Ni<sub>3</sub>P, NF/NiFe LDH, and Ni<sub>3</sub>P/NiFe LDH.

| atomic ratio<br>sample          | Ni           | Fe           | P            | O            | C            | N           |
|---------------------------------|--------------|--------------|--------------|--------------|--------------|-------------|
| <b>Ni<sub>3</sub>P</b>          | <b>11.77</b> |              | <b>19.79</b> | <b>32.87</b> | <b>32.75</b> | <b>2.82</b> |
| <b>NF/NiFe LDH</b>              | <b>9.01</b>  | <b>10.08</b> |              | <b>36.28</b> | <b>38.67</b> | <b>5.96</b> |
| <b>Ni<sub>3</sub>P/NiFe LDH</b> | <b>9.96</b>  | <b>9.18</b>  | <b>8.88</b>  | <b>31.02</b> | <b>33.27</b> | <b>7.69</b> |

**Table S2.** Comparison of OER catalytic activity between Ni<sub>3</sub>P/NiFe LDH and recently reported advanced electrocatalyst in 1 M KOH solution at current density of 10 mA·cm<sup>-2</sup>.

| Catalyst                                                 | $\eta_{10}^*$<br>(mV) | Tafel slope<br>(mV dec <sup>-1</sup> ) | Reference                                                      |
|----------------------------------------------------------|-----------------------|----------------------------------------|----------------------------------------------------------------|
| Ni <sub>3</sub> P/NiFe LDH                               | 196                   | 25.2                                   | This work                                                      |
| NF@Fe <sub>2</sub> -Ni <sub>2</sub> P/C                  | 205                   | 52                                     | <i>ACS Catal.</i> <b>2019</b> , 9 (10), 8882-8892.             |
| NiFe LDH-NS@DG10                                         | 210                   | 52                                     | <i>Adv. Mater.</i> <b>2017</b> , 29 (17), 1700017.             |
| Ni <sub>2</sub> P-Ni <sub>3</sub> S <sub>2</sub> HNAs/NF | 210                   | 62                                     | <i>Nano Energy.</i> <b>2018</b> , 51, 26-36.                   |
| Gd-NiFe-LDH@CC                                           | 210                   | 40.9                                   | <i>J. Mater. Chem. A.</i> <b>2021</b> , 9 (5), 2999-3006.      |
| NiFe-MOF                                                 | 215                   | 49.1                                   | <i>Adv. Funct. Mater.</i> <b>2021</b> , 31 (33), 2102066.      |
| Ru/Ni <sub>3</sub> V-LDH                                 | 225                   | 33                                     | <i>J. Am. Chem. Soc.</i> <b>2022</b> , 144 (3), 1174-1186.     |
| Ni/CeO <sub>2</sub> @N-CNFs                              | 230                   | 54.2                                   | <i>Small.</i> <b>2022</b> , 18 (13), 2106592.                  |
| NiPS <sub>2.7</sub> Se <sub>0.3</sub>                    | 250                   | 76                                     | <i>Adv. Funct. Mater.</i> <b>2021</b> , 31 (19), 2100618.      |
| CoFe LDHs-Ar/NF                                          | 266                   | 37.85                                  | <i>Angew. Chem. Int. Ed.</i> <b>2017</b> , 56 (21), 5867-5871. |
| NiCo <sub>2</sub> S <sub>4</sub> @NiFe LDH               | 370                   | 96                                     | <i>App. Catal. B-Environ.</i> <b>2021</b> , 286, 119869.       |

**Table S3.** Comparison of OER catalytic activity between Ni<sub>3</sub>P/NiFe LDH and recently reported advanced electrocatalyst in 1 M KOH solution at current density of 100 mA·cm<sup>-2</sup>.

| Catalyst                                     | $\eta_{100}^*$<br>(mV) | Tafel slope<br>(mV dec <sup>-1</sup> ) | Reference                                                        |
|----------------------------------------------|------------------------|----------------------------------------|------------------------------------------------------------------|
| Ni <sub>3</sub> P/NiFe LDH                   | 226                    | 25.2                                   | <b>This work</b>                                                 |
| NiFe MOF/NF                                  | 240                    | 44.1                                   | <i>Angew. Chem. Int. Ed.</i> <b>2021</b> , 60 (23), 12770-12774. |
| FeNi-LDH/CoP/CC                              | 248.9                  | 33.5                                   | <i>Angew. Chem. Int. Ed.</i> <b>2019</b> , 58 (34), 11903-11909. |
| NiFeRu LDH                                   | 258                    | -                                      | <i>Adv. Mater.</i> <b>2018</b> , 30 (10), 1706279.               |
| Ni-Fe NPs                                    | 270                    | 58                                     | <i>Nat. Commun.</i> <b>2019</b> , 10 (1), 5599.                  |
| NiMoN@NiFeN                                  | 277                    | 58.6                                   | <i>Nat. Commun.</i> <b>2019</b> , 10 (1), 5106.                  |
| S,P-<br>(Ni,Mo,Fe)OOH/NiMo<br>P/Wood aerogel | 279                    | 56.7                                   | <i>Appl. Catal. B-Environ.</i> <b>2021</b> , 293, 120215.        |
| CoFeZr oxides                                | 290                    | 54.2                                   | <i>Adv. Mater.</i> <b>2019</b> , 31 (28), 1901439.               |
| Strained FeP <sub>2</sub> /NF                | 315                    | 56                                     | <i>Adv. Funct. Mater.</i> <b>2020</b> , 30 (12), 1907791.        |
| Cu@CoFe LDH                                  | 318                    | 44.4                                   | <i>Nano Energy.</i> <b>2017</b> , 41, 327-336.                   |
| FeCoNi nanotube array                        | 390                    | 49.9                                   | <i>Nano Res.</i> <b>2016</b> , 9 (3), 831-836.                   |

**Table S4.** Comparison of OER catalytic activity between Ni<sub>3</sub>P/NiFe LDH and recently reported advanced electrocatalyst in 1 M KOH solution at current density of 500 mA·cm<sup>-2</sup>.

| Catalyst                                                       | $\eta_{500}^*$<br>(mV) | Tafel slope<br>(mV dec <sup>-1</sup> ) | Reference                                                          |
|----------------------------------------------------------------|------------------------|----------------------------------------|--------------------------------------------------------------------|
| Ni <sub>3</sub> P/NiFe LDH                                     | 261                    | 25.2                                   | This work                                                          |
| Fe <sub>0.01</sub> &Mo-NiO                                     | 272                    | 51.1                                   | <i>Energy &amp; Environ. Sci.</i> <b>2022</b> , 15 (9), 3945-3957. |
| NiMo <sub>x</sub> /NiMoS                                       | 278                    | 34                                     | <i>Nat. Commun.</i> <b>2020</b> , 11 (1), 5462.                    |
| NiFe-MOF                                                       | 297                    | 49.1                                   | <i>Adv. Funct. Mater.</i> <b>2021</b> , 31 (33), 2102066.          |
| Cu@NiFe LDH                                                    | 311                    | 27.8                                   | <i>Energy &amp; Environ. Sci.</i> <b>2017</b> , 10 (8), 1820-1827. |
| NiMoN@NiFeN                                                    | 337                    | 58.6                                   | <i>Nat. Commun.</i> <b>2019</b> , 10 (1), 5106.                    |
| CoP <sub>x</sub> @FeOOH                                        | 337                    | 37.6                                   | <i>Appl. Catal. B-Environ.</i> <b>2021</b> , 294, 120256.          |
| Co <sub>9</sub> S <sub>8</sub> @Fe <sub>3</sub> O <sub>4</sub> | 350                    | 54                                     | <i>ACS Catal.</i> <b>2022</b> , 12 (8), 4318-4326.                 |
| Ni-Fe-OH@Ni <sub>3</sub> S <sub>2</sub> /NF                    | 370                    | -                                      | <i>Adv. Mater.</i> <b>2017</b> , 29 (22), 1700404.                 |
| Ni-Mo-B HF                                                     | 407                    | 79.0                                   | <i>Adv. Funct. Mater.</i> <b>2022</b> , 32 (4), 2107308.           |

**Table S5.** Comparison of OER catalytic activity between Ni<sub>3</sub>P/NiFe LDH and recently reported advanced electrocatalyst in 1 M KOH solution at current density of 1000 mA·cm<sup>-2</sup>.

| Catalyst                                | $\eta_{1000}^*$<br>(mV) | Tafel slope<br>(mV dec <sup>-1</sup> ) | Reference                                                             |
|-----------------------------------------|-------------------------|----------------------------------------|-----------------------------------------------------------------------|
| Ni <sub>3</sub> P/NiFe LDH              | 288                     | 25.2                                   | This work                                                             |
| NF@Fe <sub>2</sub> -Ni <sub>2</sub> P/C | 300                     | 52                                     | <i>ACS Catal.</i> <b>2019</b> , 9 (10), 8882-8892.                    |
| FeNiCoCrMnS <sub>2</sub>                | 308                     | 39.1                                   | <i>Adv. Funct. Mater.</i> <b>2021</b> , 31 (48),<br>2106229.          |
| Cu@NiFe LDH                             | 315                     | 27.8                                   | <i>Energy &amp; Environ. Sci.</i> <b>2017</b> , 10 (8),<br>1820-1827. |
| NiFe LDH/NiS                            | 325                     | 60.1                                   | <i>Adv. Energy Mater.</i> <b>2021</b> , 11 (46),<br>2102353.          |
| Zn-(Ni/FeOOH)@NF                        | 330                     | 33                                     | <i>Small.</i> <b>2022</b> , 18 (37), 2203710.                         |
| CoS@NiFe/NF                             | 330                     | 73.1                                   | <i>Chem. Asian. J.</i> <b>2020</b> , 15 (9), 1484-<br>1492.           |
| NiFe(OH) <sub>x</sub> /FeS/1F           | 332                     | -                                      | <i>Adv. Funct. Mater.</i> <b>2019</b> , 29 (36),<br>1902180.          |
| Ni <sub>2</sub> P-Fe <sub>2</sub> P/NF  | 337                     | 58                                     | <i>Adv. Funct. Mater.</i> <b>2021</b> , 31 (1), 2006484.              |
| 0.05-MnCuCo <sub>2</sub> Se             | 345                     | 68                                     | <i>Appl. Catal. B-Environ.</i> <b>2022</b> , 316,<br>121649.          |
| Fe-CoP/NF                               | 428                     | 36                                     | <i>Adv. Sci.</i> <b>2018</b> , 5 (10), 1800949.                       |



**Table S6.** Comparison of water splitting activity between Ni<sub>3</sub>P/NiFe LDH and other reported electrocatalysts in 1 M KOH solution at current density of 10 mA·cm<sup>-2</sup>.

| Catalyst                                  | voltage<br>@j <sub>10</sub> (V) | Durability | Substrate | Reference                                                                 |
|-------------------------------------------|---------------------------------|------------|-----------|---------------------------------------------------------------------------|
| Ni <sub>3</sub> P/NiFe LDH                | 1.54                            | 108 h      | NF        | This work                                                                 |
| NiFe-MOF-5                                | 1.57                            | 24 h       | NF        | <i>Inorg. Chem. Front.</i> , <b>2021</b> , 8 (11), 2889-2899.             |
| Co <sub>3</sub> P/NiMoO <sub>4</sub>      | 1.57                            | 12 h       | NF        | <i>Ceram. Int.</i> , <b>2019</b> , 45 (14), 17128-17136.                  |
| Ni-NiO@3DHPG                              | 1.59                            | -          | SCG       | <i>Electro. Acta</i> , <b>2019</b> , 298, 163-171.                        |
| FeCoP UNSAs                               | 1.6                             | 20 h       | NF        | <i>Nano Energy</i> , <b>2017</b> , 41, 583-590.                           |
| Fe-Ni <sub>2</sub> P/MoS <sub>x</sub> /NF | 1.61                            | 36 h       | NF        | <i>Adv. Mater.</i> , <b>2020</b> , 7 (12), 1901926.                       |
| Ni <sub>3</sub> S <sub>2</sub> @Ni        | 1.61                            | 30 h       | NF        | <i>J. Energy Chem.</i> , <b>2020</b> , 46, 178-186.                       |
| MoP/NF                                    | 1.62                            | 20 h       | NF        | <i>Small</i> , <b>2018</b> , 2 (5), 1700369.                              |
| S-(Co,Fe)OOH                              | 1.64                            | 50 h       | Fe foam   | <i>Nanoscale, Adv.</i> , <b>2021</b> , 3 (22), 6386-6394.                 |
| Ni <sub>3</sub> S <sub>2</sub> /NF        | 1.68                            | 14 h       | NF        | <i>Nanoscale</i> , <b>2018</b> , 10 (36), 17347-17353.                    |
| Ni/Mo <sub>2</sub> C (1:20)-SCG           | 1.68                            | 27 h       | SCG       | <i>Inter. J. Hydrogen Energy</i> , <b>2022</b> , 47 (2), 761-771.         |
| Ni(OH) <sub>2</sub> / NF                  | 1.68                            | 24 h       | NF        | <i>ACS Appl. Mater. &amp; Inter.</i> , <b>2016</b> , 8 (49), 33601-33607. |
| Fe-Al-NiSe <sub>3</sub> /rGO              | 1.7                             | 80000 s    | rGO       | <i>Nanoscale</i> , <b>2020</b> , 12 (25),                                 |

**Table S7.** Comparison of water splitting activity between Ni<sub>3</sub>P/NiFe LDH and other reported electrocatalysts in 1 M KOH solution at current density of 100 mA·cm<sup>-2</sup>.

| Catalyst                                                             | voltage@<br>j <sub>100</sub> (V) | Durability | Substrate | Reference                                                          |
|----------------------------------------------------------------------|----------------------------------|------------|-----------|--------------------------------------------------------------------|
| Ni <sub>3</sub> P/NiFe LDH                                           | 1.77                             | 108 h      | NF        | This work                                                          |
| VCoFe <sub>2</sub> O <sub>x</sub> /VCoFe <sub>2</sub> S <sub>x</sub> | 1.79                             | -          | NF        | <i>New J. Chem.</i> , <b>2022</b> , 46 (8),<br>3555-3559.          |
| Fe, Al-NiSe <sub>2</sub> /rGo                                        | 1.8                              | 100 h      | NF        | <i>Energy &amp; Fuels</i> , <b>2019</b> , 33 (11),<br>12052-12062. |

**Table S8.** Comparison of OER catalytic activity between Ni<sub>3</sub>P/NiFe LDH and recently reported advanced electrocatalyst in 1 M KOH + 0.5 M NaCl solution at current density of 100 mA·cm<sup>-2</sup>.

| Catalyst                                                       | $\eta_{100}^*$<br>(mV) | Durability | Substrate | Reference                                                            |
|----------------------------------------------------------------|------------------------|------------|-----------|----------------------------------------------------------------------|
| Ni <sub>3</sub> P/NiFe LDH                                     | 267                    | 78 h       | NF        | This work                                                            |
| Gly-@NCP                                                       | 268                    | 20 h       | CP        | <i>Adv. Sci.</i> , <b>2021</b> , 8 (14), 2100498.                    |
| S-(Ni,Fe)OOH                                                   | 278                    | 100 h      | NF        | <i>Energy-Environ. Sci.</i> , <b>2020</b> , 13 (10), 3439-3446.      |
| NiMoN@NiFeN                                                    | 286                    | 100 h      | NF        | <i>Nat. Commun.</i> , 10, 5106 (2019).                               |
| (NiFeCoV)S <sub>2</sub>                                        | 299                    | 50 h       | NF        | <i>J. Colloid Inter. Sci.</i> , <b>2023</b> , 645, 724-734.          |
| CoP <sub>x</sub> @FeOOH                                        | 300                    | 80 h       | NF        | <i>Appl. Catal. B-Environ.</i> , <b>2021</b> , 294, 120256.          |
| Ni <sub>2</sub> P-Fe <sub>2</sub> P/NF                         | 305                    | 48 h       | NF        | <i>Adv. Funct. Mater.</i> , <b>2021</b> , 31 (1), 2006484.           |
| Fe-Ni(OH) <sub>2</sub> /<br>Ni <sub>3</sub> S <sub>2</sub> @NF | 320                    | 27 h       | NF        | <i>Nano Research</i> , <b>2021</b> , 14, 1149–1155.                  |
| NiFe/NiS <sub>x</sub> -Ni                                      | 330                    | 500 h      | NF        | <i>P. National Acad. Sci.</i> , <b>2019</b> , 116 (14), 6624-6629.   |
| Cr-Co <sub>x</sub> P                                           | 330                    | 140 h      | NF        | <i>Adv. Funct. Mater.</i> , <b>2023</b> , 2214081.                   |
| NiCoHPi@Ni <sub>3</sub> N/NF                                   | 365                    | 120 h      | NF        | <i>ACS Appl. Mater. Inter.</i> , <b>2022</b> , 14 (19), 22061-22070. |
| Co-Fe-O-B-10                                                   | 434                    | 20 h       | GC        | <i>ACS Appl. Energy Mater.</i> , <b>2020</b> , 3 (8), 7619-7628.     |

Note: NF (Ni foam), CP (Carbon Paper), GC (Glassy Carbon).

**Table S9.** Comparison of OER catalytic activity between Ni<sub>3</sub>P/NiFe LDH and recently reported advanced electrocatalyst in 1 M KOH + 0.5 M NaCl solution at current density of 500 mA·cm<sup>-2</sup>.

| Catalyst                     | $\eta_{1000}^*$<br>(mV) | Durability | Substrate | Reference                                                                      |
|------------------------------|-------------------------|------------|-----------|--------------------------------------------------------------------------------|
| Ni <sub>3</sub> P/NiFe LDH   | 308                     | 78 h       | NF        | <b>This work</b>                                                               |
| CoP <sub>x</sub> @FeOOH      | 360                     | 80 h       | NF        | <i>Appl. Catal. B-Environ.</i> , <b>2021</b> ,<br>294, 120256.                 |
| Cr-Co <sub>x</sub> P         | 375                     | 140 h      | NF        | <i>Adv. Funct. Mater.</i> , <b>2023</b> ,<br>2214081.                          |
| S, B-(CoFeV)OOH              | 388                     | 50 h       | NF        | <i>ACS Appl. Energy Mater.</i> , <b>2021</b> , 4<br>(7), 6942-6956.            |
| NiCoHPi@Ni <sub>3</sub> N/NF | 425                     | 120 h      | NF        | <i>ACS Appl. Mater.s &amp; Inter.</i> ,<br><b>2022</b> , 14 (19), 22061-22070. |

**Table S10.** Comparison of OER catalytic activity between Ni<sub>3</sub>P/NiFe LDH and recently reported advanced electrocatalyst in 1 M KOH + 0.5 M NaCl solution at current density of 1000 mA·cm<sup>-2</sup>.

| Catalyst                   | $\eta_{1000}^*$<br>(mV) | Durability | Substrate | Reference                                                         |
|----------------------------|-------------------------|------------|-----------|-------------------------------------------------------------------|
| Ni <sub>3</sub> P/NiFe LDH | 330                     | 78 h       | NF        | <b>This work</b>                                                  |
| Cr-Co <sub>x</sub> P       | 404                     | 140 h      | NF        | <i>Adv. Funct. Mater.</i> , <b>2023</b> ,<br>2214081.             |
| Go@Fe@Ni-Co/NF             | 434                     | 0.2 h      | NF        | <i>J. Mater. Chem. A.</i> , <b>2020</b> , 8 (46),<br>24501-24514. |

## References

1. G. Kresse, J. Furthmüller, Efficiency of Ab-Initio Total Energy Calculations for Metals and Semiconductors Using a Plane-Wave Basis Set. *Comput. Mater. Sci.*, 1996, **6**, 15-50.
2. G. Kresse, J. Furthmüller, Efficient Iterative Schemes for Ab Initio Total-Energy Calculations Using a Plane-Wave Basis Set. *Phys. Rev. B*, 1996, **54**, 11169-11186.
3. J. P. Perdew, K. Burke, M. Ernzerhof, Generalized Gradient Approximation Made Simple. *Phys. Rev. Lett.*, 1996, **77**, 3865-3868.
4. G. Kresse, D. Joubert, From Ultrasoft Pseudopotentials to the Projector Augmented-Wave Method. *Phys. Rev. B*, 1999, **59**, 1758-1775.
5. P. E. Blöchl, Projector Augmented-Wave Method. *Phys. Rev. B*, 1994, **50**, 17953-17979.
